# Supplementary material
Source: publisher site journal article supplement (https://www.dovepress.com/article/562422)
Supplement: Supplementary file 1 [file 562422%20Revised%20supplementary.pdf]

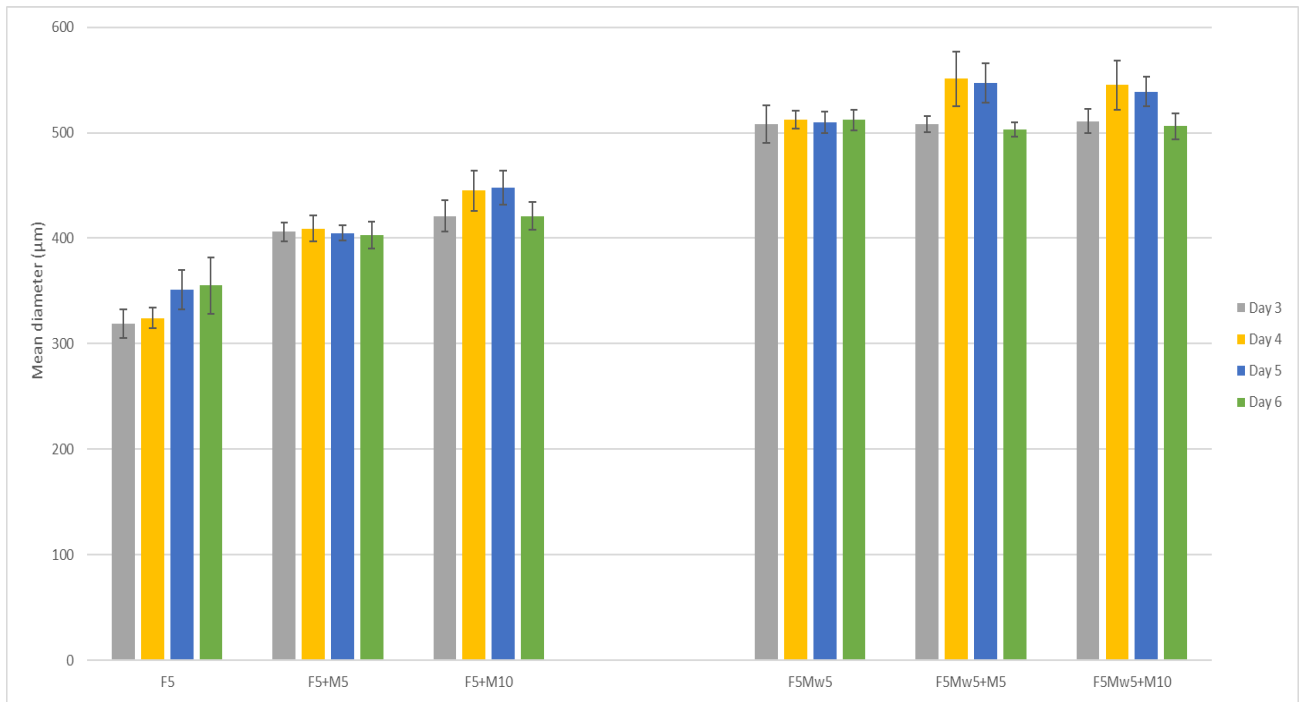

**Supplementary Figure S1.** Growth kinetics of different types of spheroids.

| Gene           | Forward sequence (5'-3')  | Reverse sequence (5'-3') |
|----------------|---------------------------|--------------------------|
| CD80           | CTGCCTGACCTACTGCTTTG      | GGCGTACACTTTCCCTTCTC     |
| CD163          | ACATAGATCATGCATCTGTCATTTG | ATTCTCGGAATCTCACTTCTA    |
| $\beta$ -actin | AGAGCTACGAGCTGCCTGAC      | AGCACTGTGTTGGCGTACAG     |
| TNF- $\alpha$  | AGGCGCTCCCAAGAAGACA       | TCCTTGGCAAACTGCACCT      |
| IL-1 $\beta$   | GCAGTCTACACAGCTTCGGG      | CCGCCTCAGCCTCCCAAAG      |
| IL-10          | TTGCTGGAGGACTTTAAGGGTTAC  | CCTGATGTCTGGGTCTTGGTTCTC |
| IL-12          | CCAGAGCAGTGAGGTCTTAGGC    | GTGAAGCAGCAGGAGCGAATG    |
| MMP-9          | AAGGATGGGAAGTACTGG        | GCCCAGAGAAGAAGAAAAG      |
| E-Cadherin     | GAACAGCACGTACACAGCCCT     | GCAGAAGTGTCCCTGTTCCAG    |
| Vimentin       | GGAAACTAATCTGGATTCACTC    | CATCTCTAGTTTCAACCGTC     |
| N-Cadherin     | GACGGTTCGCCATCCAGAC       | TCGATTGGTTTGACCACGG      |
| CCL2           | CAGCCAGATGCAATCAATGCC     | TGGAATCCTGAACCCACTTCT    |
| TGF-Beta       | AGGGCTTTCGCCTTAGCGCC      | GCCGCACGCAGCAGTTCTTC     |
| PDL-1          | TGGCATTGCTGAACGCATTT      | TGCAGCCAGGTCTAATTGTTTT   |

**Supplementary Table 1.** Primer sequences used in the assessment of gene expression by RT-qPCR (human nucleotide sequence).
